# Supplementary material for: A multifunctional oxygen-producing MnO2-based nanoplatform for tumor microenvironment-activated imaging and combination therapy in vitro
Source: Royal Society of Chemistry journal article supplement (doi:10.1039/d0tb00529k), 2020-01-01
Supplement: d0tb00529k1.pdf [file d0tb00529k1.pdf]

## Supporting Information

### **A multifunctional oxygen-producing MnO<sub>2</sub>-based nanoplatform for tumor microenvironment-activated imaging and combined therapy in vitro**

*Chunlei Yang, Yazhou Liu, Sa Su, Na Gao, Jing Jing\*, Xiaoling Zhang\**

Key Laboratory of Cluster Science of Ministry of Education, Beijing Key Laboratory of Photoelectronic/Electrophotonic Conversion Materials, School of Chemistry and Chemical Engineering.

Beijing Institute of Technology, Beijing, 100081, P.R. China.

E-mail addresses: [hellojane@bit.edu.cn](mailto:hellojane@bit.edu.cn) (*Jing Jing*), [zhangxl@bit.edu.cn](mailto:zhangxl@bit.edu.cn) (*Xiaoling Zhang*).

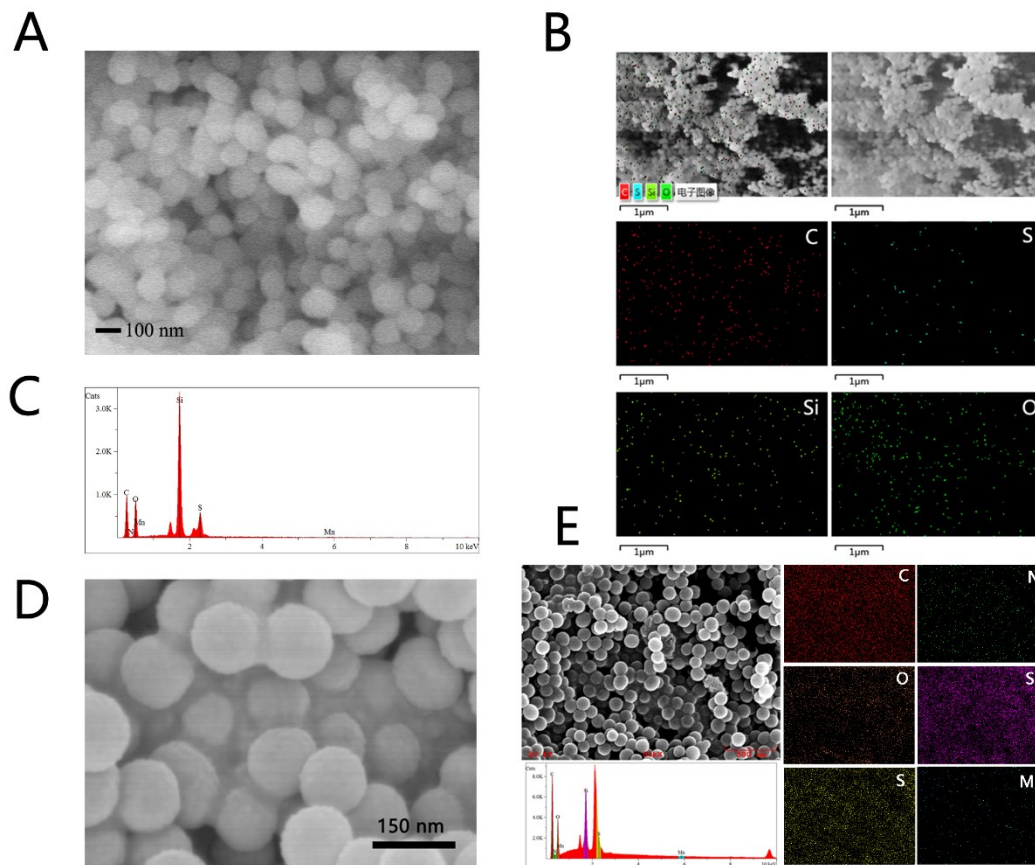

**Figure S1.** (A) SEM image and (B) corresponding EDS mapping of MONs. (C) EDS and (D) SEM image of MONs-GOx@MnO<sub>2</sub>-Ce6. (E) SEM image and corresponding element mappings of MONs-GOx@MnO<sub>2</sub>-Ce6.

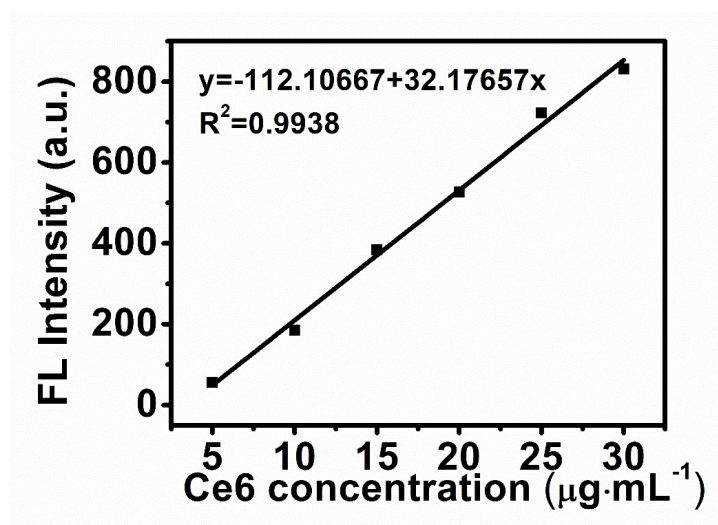

**Figure S2.** linear relationships between the concentration of Ce6 and fluorescence spectra.

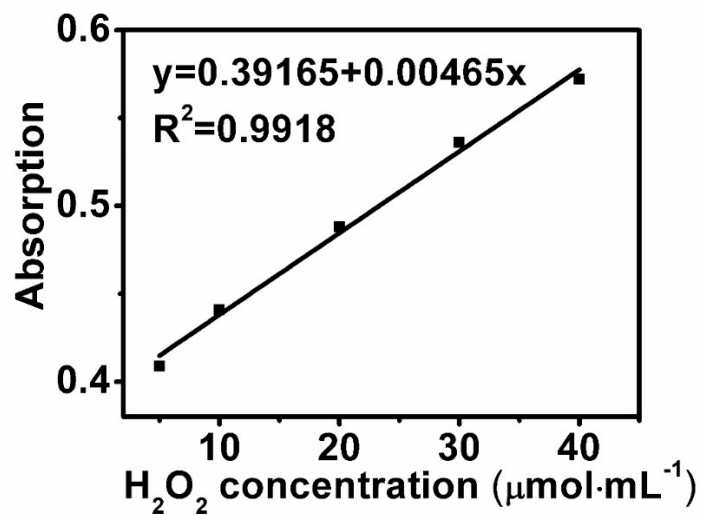

**Figure S3.** linear relationships between the concentration of H<sub>2</sub>O<sub>2</sub> and the UV-vis absorption of yellow titanium peroxide complex

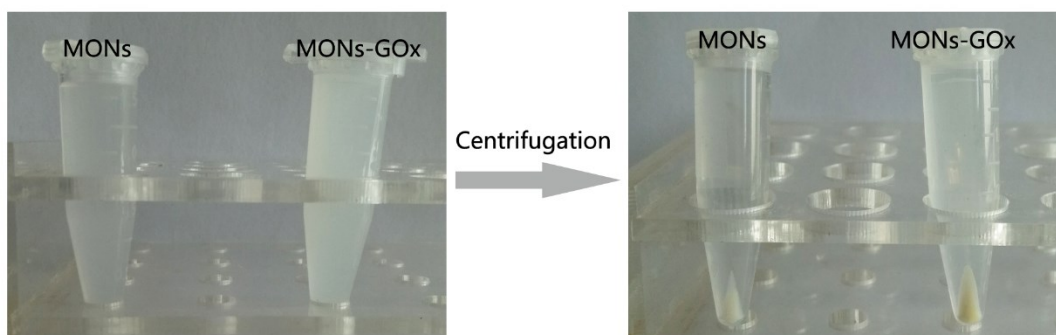

**Figure S4.** Photos of MONs and MONs-GOx in solutions before (left) and after (right) centrifugation.

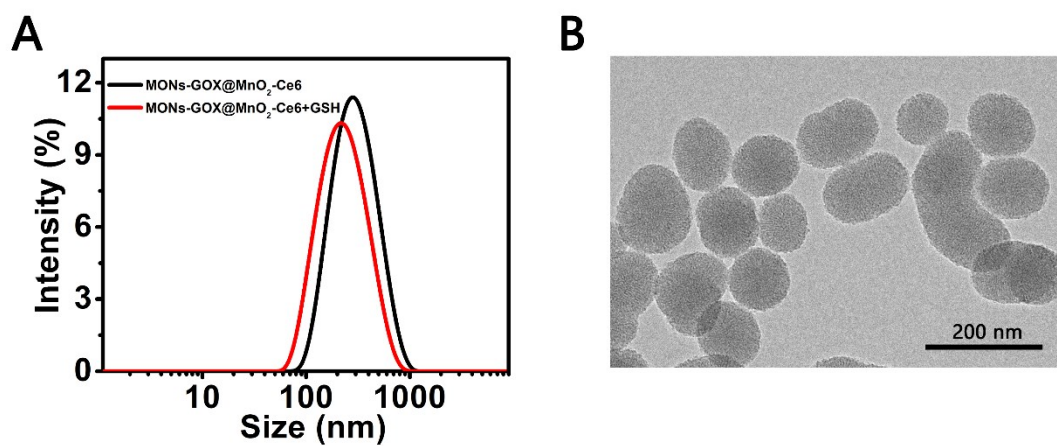

**Figure S5.** (A) DLS particle size distribution of MONs-GOx@MnO<sub>2</sub>-Ce6 before and after GSH degradation. (B) TEM image of MONs-GOx@MnO<sub>2</sub>-Ce6 after GSH degradation.

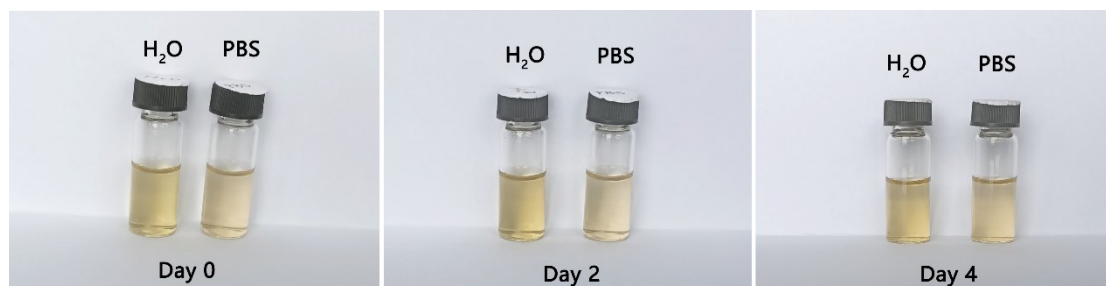

**Figure S6.** Photographs of MONs-GOx@MnO<sub>2</sub>-Ce6 in various aqueous media (DDI water and PBS) at different time.

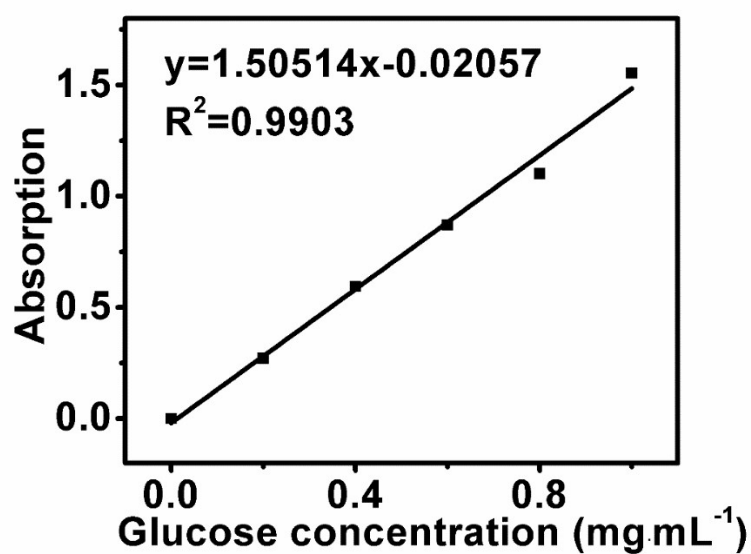

**Figure S7.** Linear relationships between the concentration of glucose and the UV-vis absorption.

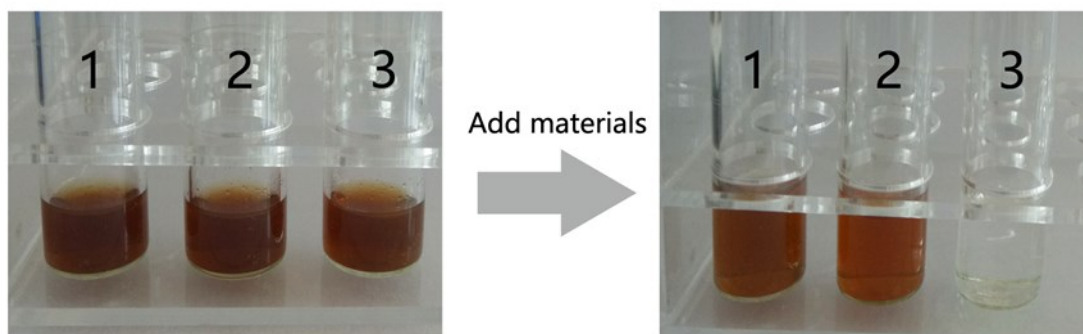

**Figure S8.** Brown  $\text{MnO}_2$  solutions reacting with 1:  $\text{H}_2\text{O}$ , 2:  $\text{H}^+$  and 3:  $\text{H}_2\text{O}_2/\text{H}^+$ .
